# Supplementary material for: The level of macrophage migration inhibitory factor is negatively correlated with the efficacy of PD-1 blockade immunotherapy combined with chemotherapy as a neoadjuvant therapy for esophageal squamous cell carcinoma
Source: PubMed Central journal article supplement — Transl Oncol. 2023 Sep 6;37:101775. doi: 10.1016/j.tranon.2023.101775 (PMC10492201; doi:10.1016/j.tranon.2023.101775), 2023-09-06
Supplement: mmc1.pdf [file mmc1.pdf]

## Supplementary Figure 2

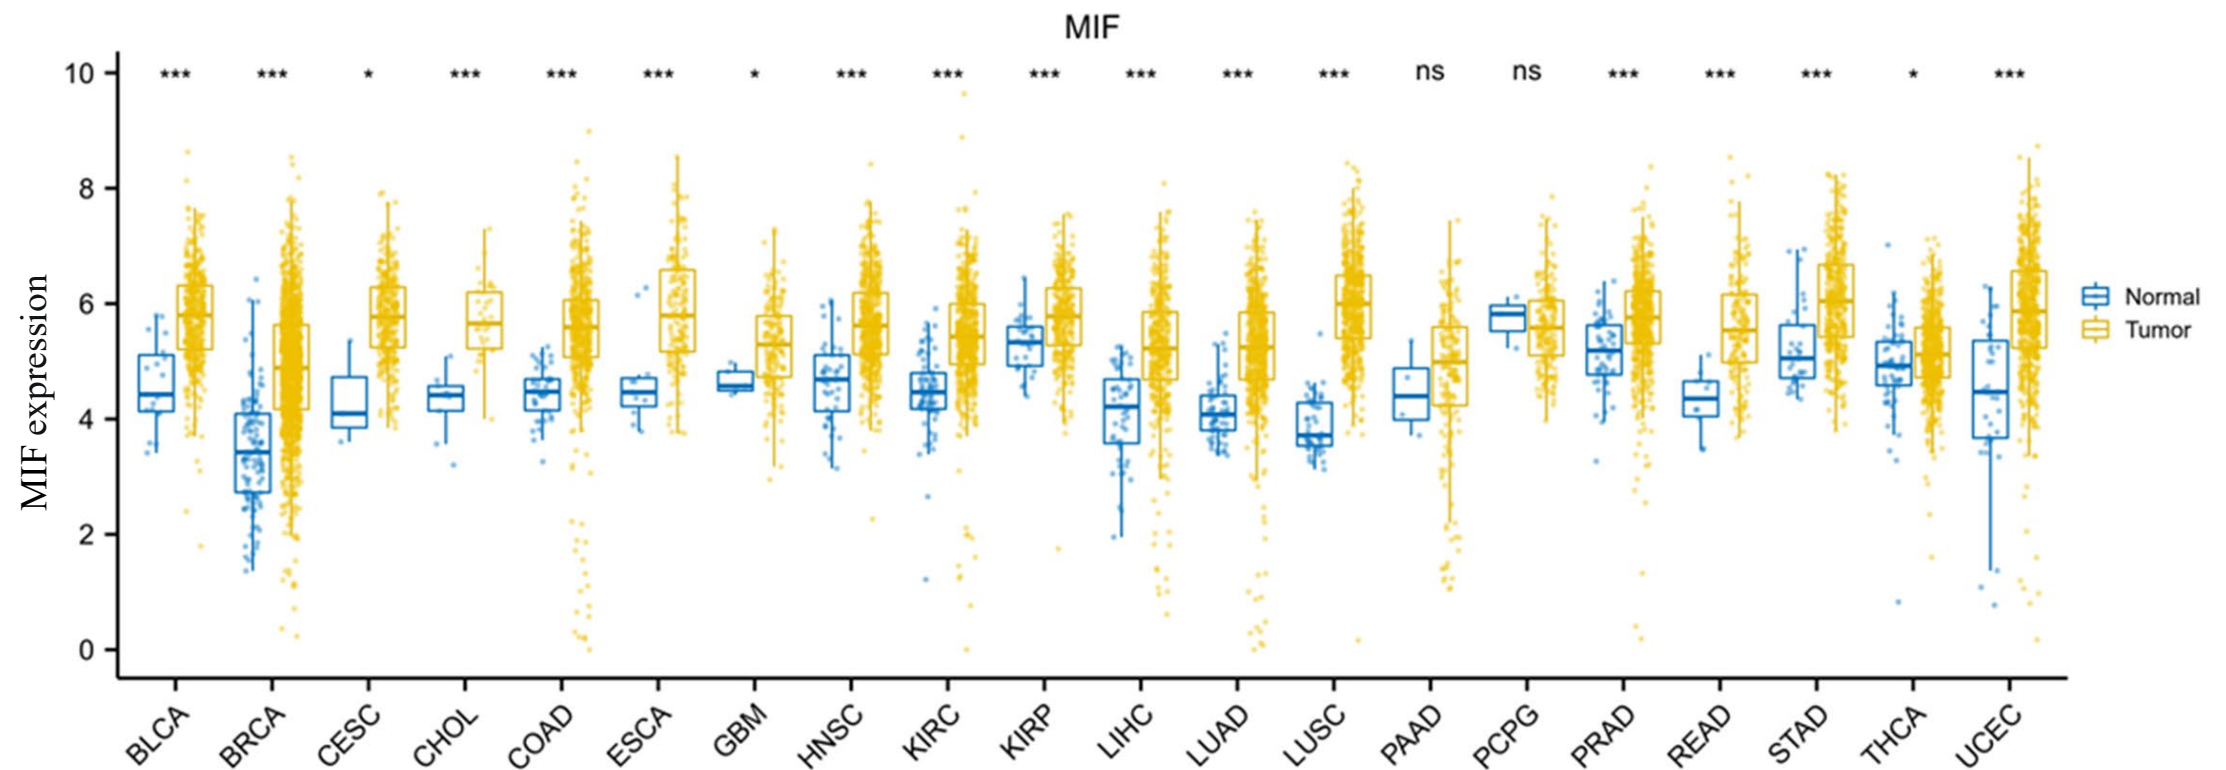

Supplementary Figure 2. The comparisons between the expression level of MIF in different tumors and normal tissues. Data were provided by TCGA database. \* $p < 0.05$ , \*\* $p < 0.01$ , \*\*\* $p < 0.001$ . BLCA, bladder urothelial carcinoma; BRCA, breast cancer; CESC, cervical squamous cell carcinoma and endocervical adenocarcinoma; CHOL, cholangiocarcinoma; COAD, colon adenocarcinoma; ESCA, esophageal carcinoma; GBM, glioblastoma multiforme; HNSC, head and neck squamous cell carcinoma; KIRC, kidney renal clear cell carcinoma; KIRP, kidney renal papillary cell carcinoma; LIHC, liver hepatocellular carcinoma; LUAD, lung adenocarcinoma; LUSC, lung squamous cell carcinoma; PAAD, pancreatic adenocarcinoma; PCPG, pheochromocytoma and paraganglioma; PRAD, prostate adenocarcinoma; READ, rectum adenocarcinoma; STAD, stomach adenocarcinoma; THCA, thyroid carcinoma; UCEC, uterine corpus endometrial carcinoma; ns, non-significant.



**Supplementary Figure 3**

MIF

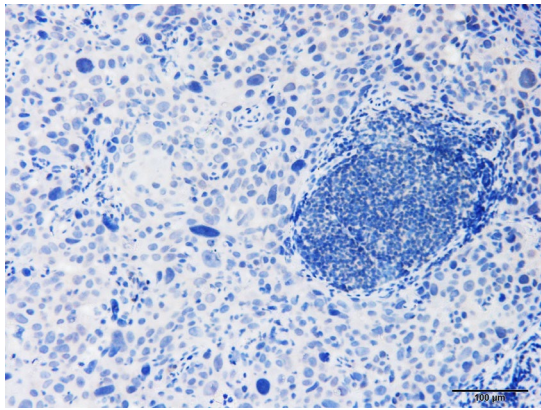

PD-L1

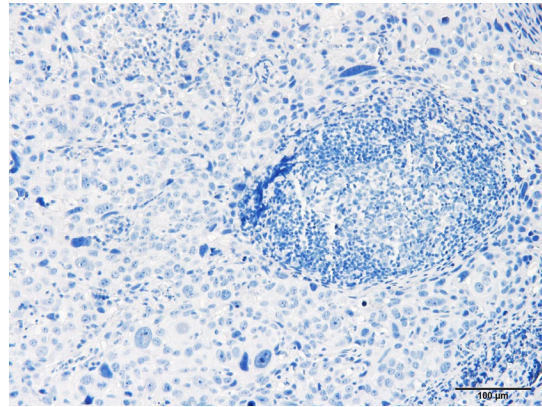

CD20

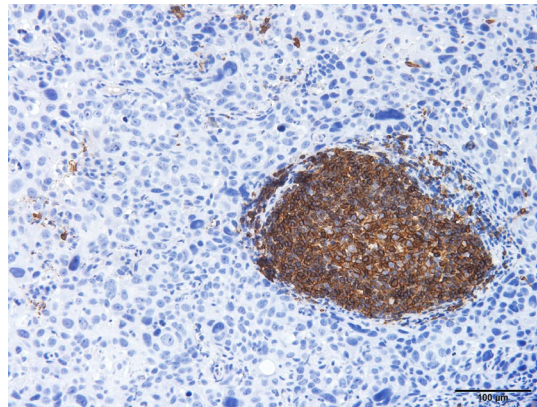

CD8

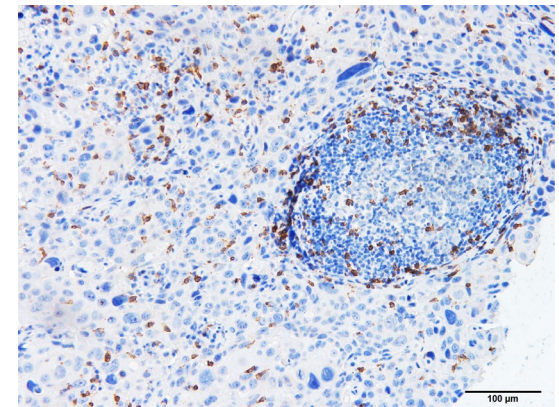

CD4

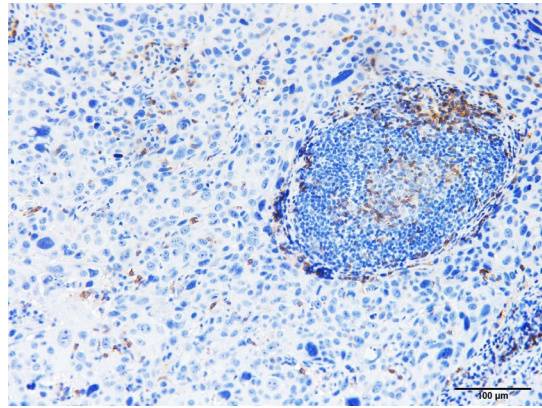

Foxp3

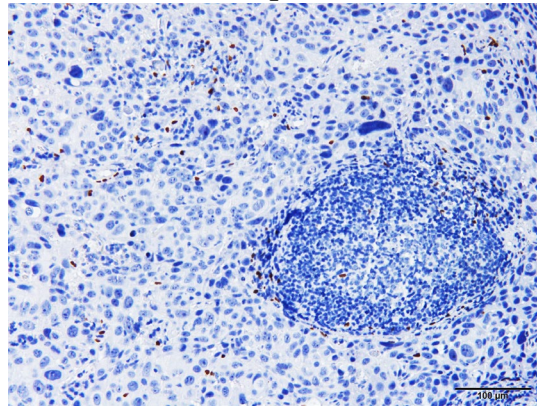

CD163

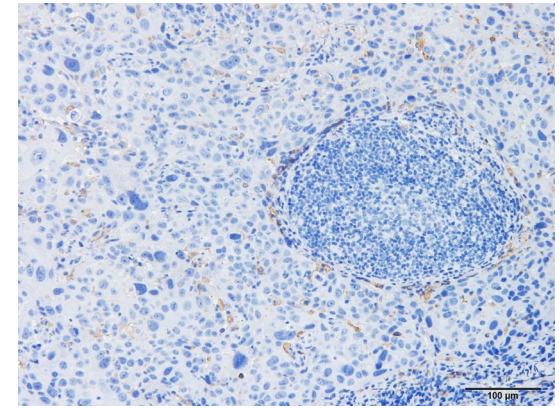

Supplementary Figure 3. IHC images of the TLS observed in the other patient. Original magnification×200.
